# Supplementary material for: DuoBody-CD40x4-1BB induces dendritic-cell maturation and enhances T-cell activation through conditional CD40 and 4-1BB agonist activity
Source: PubMed Central journal article supplement — J Immunother Cancer. 2022 Jun 10;10(6):e004322. doi: 10.1136/jitc-2021-004322 (PMC9189854; doi:10.1136/jitc-2021-004322), 2022-06-10
Supplement: jitc-2021-004322supp001.pdf [file jitc-2021-004322supp001.pdf]

## Supplementary Methods

### Antibodies and reagents

#### Research antibodies

Antibodies were in general produced at Genmab in a human IgG1 backbone and included Fc-silencing mutations (L234F, L235E, D265A) and matched DuoBody mutations in the CH3 region for cFAE (F405L and K409R), unless otherwise specified.

| Antibody                     | Description                                                                                                                                                                                                                | Supplier (batch/cat. no.)    |
|------------------------------|----------------------------------------------------------------------------------------------------------------------------------------------------------------------------------------------------------------------------|------------------------------|
| DuoBody-CD40x4-1BB           | BsAb that contains a CD40-specific Fab arm, a 4-1BB-specific Fab arm and a human IgG1 backbone with Fc-silencing and the DuoBody mutations                                                                                 | Genmab (6306-06-08)          |
|                              |                                                                                                                                                                                                                            | Genmab (3898-197-EP)         |
|                              |                                                                                                                                                                                                                            | Genmab (6306-31-11-EP)       |
|                              |                                                                                                                                                                                                                            | Genmab (508332)              |
| DuoBody-CD40x4-1BB surrogate | BsAb that contains a non-humanized variant of the CD40-specific Fab-arm of GEN1042, a non-humanized variant of the 4-1BB-specific Fab arm of GEN1042 and a human IgG1 backbone with Fc-silencing and the DuoBody mutations | Genmab (3593-060-EP)         |
| mAb-CD40-FEAL                | Bivalent CD40-specific mAb in a human IgG1 backbone with Fc-silencing and a DuoBody mutation; parental antibody for DuoBody-CD40x4-1BB                                                                                     | Genmab (4121-130-EP)         |
| mAb-CD40 (active Fc)         | Bivalent CD40-specific mAb that contains the CD40-specific Fab arm of DuoBody-CD40x4-1BB in an Fc-active human IgG1 backbone                                                                                               | Genmab (170802_PSM_0024#004) |
| mAb-4-1BB-FEAR               | Bivalent 4-1BB-specific mAb in a human IgG1 backbone with Fc-silencing and a DuoBody mutation; parental antibody for DuoBody-CD40x4-1BB                                                                                    | Genmab (4121-131-EP)         |
| bsAb-CD40xctrl               | BsAb that contains a CD40-specific Fab arm, a non-binding control (ctrl) Fab arm based on IgG-b12, and a human IgG1 backbone with Fc-silencing and the DuoBody mutations                                                   | Genmab (170628_PSM_0016#001) |
|                              |                                                                                                                                                                                                                            | Genmab (180202_PSM_0002#001) |
|                              |                                                                                                                                                                                                                            | Genmab (180109_PSM_0050#001) |
|                              |                                                                                                                                                                                                                            | Genmab (3727-032-EP)         |
| bsAb-ctrlx4-1BB              | BsAb that contains a 4-1BB-specific Fab arm, a non-binding control (ctrl) Fab arm based on IgG-b12, and a human IgG1 backbone with Fc-silencing and the DuoBody mutations                                                  | Genmab (170626_PSM_0016#001) |
|                              |                                                                                                                                                                                                                            | Genmab (171205_PSM_0000#005) |
|                              |                                                                                                                                                                                                                            | Genmab (180801_PSM_0031#002) |
|                              |                                                                                                                                                                                                                            | Genmab (3593-072-EP)         |
| mAb-ctrl-FEAL                | Bivalent non-binding control (ctrl) mAb based on IgG-b12 in a human IgG1 backbone with Fc-silencing and a DuoBody mutation                                                                                                 | Genmab (3666-078-EP)         |
|                              |                                                                                                                                                                                                                            | Genmab (3165-065-EP)         |
|                              |                                                                                                                                                                                                                            | Genmab (201029_PSM_0071#001) |
|                              |                                                                                                                                                                                                                            | Genmab (3392-107-EP)         |
| Urelumab analog              | Bivalent urelumab analog in a human IgG1 backbone with Fc-silencing and DuoBody mutations                                                                                                                                  | Genmab (181224_PSM_0026#002) |
| Mitazalimab analog           | Bivalent Mitazalimab analog in a human IgG1 backbone with Fc-silencing and DuoBody mutations                                                                                                                               | Genmab (171205_PSM_0000#005) |
| Pembrolizumab                | Research-grade pembrolizumab                                                                                                                                                                                               | Selleckchem (cat. no. A2005) |
| Pembrolizumab                | Clinical-grade pembrolizumab                                                                                                                                                                                               | MSD, (article no. 10749880)  |

## Commercial antibodies

| Target                                                                | Label <sup>1</sup> | Clone      | Supplier               | Cat. No.    |
|-----------------------------------------------------------------------|--------------------|------------|------------------------|-------------|
| CLDN6                                                                 | DyLight650         | IMAB 027   | Ganymed                |             |
| TCRβ                                                                  | BV421              | H57-597    | BD Biosciences         | 562839      |
| IgG2λ                                                                 | BV421              | Ha4/8      | BD Biosciences         | 562629      |
| CD20                                                                  | FITC               | 2H7        | BD Biosciences         | 556632      |
| IgG, Fcγ Fragment specific                                            | APC                | -          | Jackson ImmunoResearch | 109-136-170 |
| CD3                                                                   | BV421              | SP34-2     | BD Biosciences         | 562877      |
| IgG, Fcγ Fragment Specific                                            | AF488              | -          | Jackson ImmunoResearch | 109-546-098 |
| CD137 (4-1BB)                                                         | APC                | 4B4-1      | BD Biosciences         | 550890      |
| AffiniPure F(ab') Fragment Goat Anti-human IgG, Fcγ fragment specific | R-PE               | N/A        | Jackson ImmunoResearch | 109-116-098 |
| LFA-1                                                                 | unconjugated       | HI111      | eBioscience            | 14-0119-82  |
| AffiniPure F(ab') Fragment Goat Anti-Mouse IgG (H+L)                  | AF488              | polyclonal | Jackson ImmunoResearch | 115-546-146 |
| Phalloidin                                                            | AF546              | N/A        | Thermo Fisher          | A22283      |
| HLA-DR                                                                | BV421              | G46-6      | BD                     | 562804      |
| CD86                                                                  | BUV737             | Fun-1      | BD                     | 612784      |
| CD45                                                                  | AF700              | H130       | BD                     | 560566      |
| CD3                                                                   | BUV496             | UCHT1      | BD                     | 612940      |
| CD40                                                                  | FITC               | LOB7/6     | Invitrogen             | MA5-16775   |
| 4-1BB                                                                 | PE                 | 4B4-1      | Biologend              | 309804      |
| PD-L1                                                                 | APC                | 29E.2A3    | Biologend              | 329708      |
| CD27                                                                  | BV786              | L128       | BD                     | 563327      |
| CD3                                                                   | -                  | UCHT1      | R&D systems            | MAB100-500  |
| CD4                                                                   | PE                 | RPA-T4     | TONBO Bioscience       | 50-0049     |
| CD8                                                                   | PE-Cy7             | RPA-T8     | TONBO Biosciences      | 60-0088     |
| CD19                                                                  | BV421              | HIB19      | Becton Dickinson       | 562440      |
| CD8                                                                   | PE                 | RPA-T8     | TONBO                  | 50-0088     |
| GzmB                                                                  | PE                 | GB11       | BD                     | 561142      |
| CD107a                                                                | AF647              | H4A3       | Biologend              | 328611      |
| CD3                                                                   | PE-Cy7             | UCHT1      | eBioscience            | 25-0038     |
| CD4                                                                   | FITC               | M-T466     | Miltenyi Biotec        | 130-080-501 |
| CD56                                                                  | APC                | CMSSB      | eBioscience            | 17-0567-042 |
| CD20                                                                  | APC                | 2H7        | Becton Dickinson       | 559776      |
| CD69                                                                  | FITC               | FN50       | Becton Dickinson       | 557049      |
| CD86                                                                  | PE                 | 2331/FUN-1 | Becton Dickinson       | 555658      |
| CD3                                                                   | APC-H7             | SK7        | BD Biosciences         | 560176      |
| CD4                                                                   | PE                 | Sk3        | BD Biosciences         | 345769      |
| CD8                                                                   | PerCP-Cy5.5        | RPA-T8     | BD Biosciences         | 560662      |
| CD45RA                                                                | FITC               | L48        | BD Biosciences         | 335039      |
| CCR7                                                                  | BV510              | 3D12       | BD Biosciences         | 563449      |
| HLA-DR                                                                | APC                | G46-6      | BD Biosciences         | 559866      |
| Ki67                                                                  | BV421              | B56        | BD Biosciences         | 562899      |
| CD45                                                                  | BV605              | HI30       | BD Biosciences         | 564047      |
| CD3                                                                   | APC-H7             | SK7        | BD Biosciences         | 560176      |
| CD16                                                                  | PerCP-Cy5.5        | 3G8        | BD Biosciences         | 338440      |
| CD56                                                                  | FITC               | NCAM16.2   | BD Biosciences         | 345811      |
| CD19                                                                  | PE-Cy7             | Sj2SC1     | BD Biosciences         | 341113      |
| CD86                                                                  | BV421              | 2331       | BD Biosciences         | 562432      |
| CD86                                                                  | APC                | 2331       | BD Biosciences         | 555660      |

<sup>1</sup> FITC: fluorescein isothiocyanate; PE: phycoerythrin; BV: brilliant violet; APC: allophycocyanin; AF: AlexaFluor; Cy: Cyanine;

### Cell lines

K562 cells (ATCC, CCL-243) were cultured in IMDM with 10% FBS. K562-h4-1BB cells were generated by retroviral transduction of human 4-1BB. K562-hCD40 cells were generated by stable transfection with human CD40.

### Cell culture media and buffers

| <b>Name</b>                     | <b>Composition</b>                                                                                                                                                                                                                                                                                                                                                  |
|---------------------------------|---------------------------------------------------------------------------------------------------------------------------------------------------------------------------------------------------------------------------------------------------------------------------------------------------------------------------------------------------------------------|
| X-Vivo15 medium                 | X-VIVO™ 15 chemically defined, serum-free hematopoietic cell medium (Lonza, BE02-060Q)                                                                                                                                                                                                                                                                              |
| OptiPro SFM medium              | OptiPro SFM medium (Thermo Fisher Scientific Europe B.V., 12309050) supplemented with 50 Units penicillin/50 Units streptomycin (Lonza, DE17-603E)                                                                                                                                                                                                                  |
| DC medium                       | RPMI 1640 medium supplemented with 5% plasma-derived human serum [PHS, One Lambda Inc., A25761], 1x minimum essential medium non-essential amino acids [MEM NEAA, Life Technologies GmbH, 11140-035], 1 mM sodium pyruvate [Life Technologies GmbH, 11360-039], 100 ng/mL [Miltenyi Biotec GmbH, 130-093-868] and 50 ng/mL IL-4 [Miltenyi Biotec GmbH, 130-093-924] |
| MLR medium                      | RPMI 1640 complete (ATCC modification formula, ThermoFisher, A1049101) supplemented with 10% fetal bovine serum (Gibco, 16140071)                                                                                                                                                                                                                                   |
| T-cell assay medium             | Iscove's Modified Dulbecco's Medium [IMDM, Life Technologies GmbH, 12440-053] supplemented with 5% PHS                                                                                                                                                                                                                                                              |
| Transport medium                | HypoThermosol® FRS [BioLifeSolutions, 101104] supplemented with 3% Fungizone [Thermo Fisher, 15290-026] and 300 U/mL penicillin, 300 µg/mL streptomycin [pen/strep, Thermo Fisher, 15140-122]                                                                                                                                                                       |
| Wash medium                     | X-Vivo15 medium [Lonza, BE02-060Q] supplemented with 100 U/mL penicillin and 100 µg/mL streptomycin                                                                                                                                                                                                                                                                 |
| TIL medium                      | X-Vivo15 medium supplemented with 10% human serum albumin [HSA, CSL Behring, PZN-00504775], 100 U/mL pen, 100 µg/mL strep, 1% Fungizone and 10 U/mL IL-2 [Proleukin®S, Novartis Pharma, PZN-02238131]                                                                                                                                                               |
| FACS buffer                     | DPBS supplemented with 2% FBS and 2 mM EDTA                                                                                                                                                                                                                                                                                                                         |
| FreeStyle 293 Expression Medium | FreeStyle™ 293 Expression Medium with 4 mM Glutamax (Invitrogen, 12338-018) supplemented with 50 Units penicillin/50 Units streptomycin (Lonza, DE17-603E)                                                                                                                                                                                                          |
| B-cell medium                   | X-VIVO™ 15 chemically defined, serum-free hematopoietic cell medium (Lonza, cat. no. BE02-060Q) supplemented with 10% PHS (One Lambda Inc., cat. no. A25761), 1x Glutamax (Life Technologies GmbH, cat. no. 35050-061) and 20 mM HEPES (Life Technologies GmbH, cat. no. 15630-056)                                                                                 |

### **Generation of parental antibodies mAb-CD40-FEAL and mAb-4-1BB-FEAR**

The CD40-specific parental antibody for DuoBody-CD40x4-1BB (mAb-CD40-FEAL) was based on the murine anti-human CD40 antibody Lob 7/4. The 4-1BB-specific antibody for DuoBody-CD40x4-1BB (mAb-4-1BB-FEAR) was generated by immunization of rabbits and single B-cell cloning. Both antibodies were humanized using germline humanization (complementarity-determining region [CDR]-grafting) technology (Abzena). The selected V<sub>L</sub> and V<sub>H</sub> sequences were subsequently cloned in a human backbone that also contained human IgG1 constant heavy chain regions in which the one of the DuoBody mutation (F405L or K409R) and the Fc-silencing L234F, L235E and D265A (FEA) mutations had been introduced.

### **FcγR binding assays**

Enzyme-linked immunosorbent assay (ELISA) plates (Greiner Bio-one, 655092) were coated with 1 µg/mL goat F(ab')<sub>2</sub>-anti-human (Jackson ImmunoResearch, 109-006-097), blocked with 0.2% bovine serum albumin (BSA) Fraction V (Roche, 10735086001), incubated with antibodies at RT for 1 h, followed by 1 µg/mL HIS- and biotin acceptor peptide (BAP-) tagged recombinant dimeric FcγR constructs (diFcγR HisBAP; previously described<sup>1</sup>) at RT for 1 h, Streptavidin-polyHRP (CLB, M2032) at RT for 30 min and finally 2,2'-azino-bis(3-ethylbenzothiazoline-6-sulphonic acid) (ABTS; Roche, 11112422001) at RT for 10-30 min. Absorption at OD405 was measured on an ELx808 Absorbance Microplate Reader (BioTek Instruments).

### **Biolayer interferometry (BLI)**

Target binding affinity of DuoBody-CD40x4-1BB was determined by BLI on an Octet HTX instrument (FortéBio). Experiments were carried out while shaking at 1,000 RPM at 30°C.

Activated Amine Reactive 2<sup>nd</sup> Generation (AR2G) biosensors (FortéBio, 18-0026) were loaded with recombinant human CD40 ECD fused to a His-tag (CD40-His, 7.5 µg/mL; Sino Biological, 10774-H08H) or recombinant human 4-1BB ECD fused to a His-tag (41BBHis, 2.5 µg/mL; Sino Biological, 10041-H08H) diluted in acetate buffer (pH 6.0; FortéBio, 18-1070) and quenched with 1 M ethanolamine pH 8.5 (FortéBio, 18-1071). After a baseline measurement in Sample Diluent (FortéBio, 18-1048), association (200 s) and dissociation (2,000 s) of DuoBody-CD40x4-1BB was determined.

Data were acquired using Data Acquisition Software (FortéBio, v9.0.0.49d) and analyzed with Data Analysis Software (FortéBio, v9.0.0.14). Data were fitted with the 1:1 Global Full fit model.

### **Binding to target-transfected cells**

CHO-S cells (ThermoFisher Scientific, R800-07) were transfected with full-length CD40 expression constructs (1.25 µg/mL) using Freestyle Max transfection reagent (Thermo Fisher Scientific, 16447100) and OptiPro SFM medium, according to the manufacturer's instructions. Binding of CD40-specific antibodies to CHO-S cells transiently transfected with human CD40 was analyzed by flow cytometry. HEK293F cells (ThermoFisher Scientific, R790-07) were transfected with full-length 4-1BB expression constructs (100 µg) using Freestyle Max transfection reagent and Freestyle 293 Expression medium, according to the manufacturer's instructions. Binding of 4-1BB-specific antibodies to HEK293F cells transiently transfected with human 4-1BB was analyzed by flow cytometry. Non-transfected CHO-S or HEK293F cells were used as a negative control.

### **Cell-based binding and blocking assays**

Binding of CD40-specific antibodies to primary CD20<sup>+</sup> B cells was analyzed by flow cytometry using monocyte-depleted primary human PBMCs.

Binding of 4-1BB-specific antibodies to primary CD3<sup>+</sup>4-1BB<sup>+</sup> T cells was analyzed by flow cytometry using the CD14<sup>-</sup> fraction of PBMCs that had been stimulated with Dynabeads™ Human T-Activator CD3/CD28 (Life Technologies GmbH, 11132D) for 48 h. Simultaneous binding of DuoBody-CD40x4-1BB to cells expressing CD40 or 4-1BB was analysed by flow cytometry assessment of doublet formation after co-incubation of K562-hCD40 cells labeled with CellTrace Violet (Thermo Fisher, C34557) and K562-h4-1BB cells labeled with CellTrace FarRed (Thermo Fisher, C34564), for 15 min at 37 °C.

### **Immunofluorescence and live-cell imaging**

For immunofluorescence, DCs were seeded on poly-L-lysine (0.1 µg/mL; 2 × 10<sup>6</sup> cells/well) coated coverslips for 4 h. Subsequently, CD8<sup>+</sup> T cells, which had been activated by anti-CD3/anti-CD28 coated microbeads (Thermo Fisher, 11131D), were added (4 × 10<sup>5</sup> cells/well). The cells were co-cultured for 1 h in the presence of 0.5 µg/mL of DuoBody-CD40x4-1BB or control antibodies. The cells were fixed for 10 min at RT in 4% PFA, permeabilized with 0.25% Triton-X/PBS, blocked in 2% BSA/PBS and stained for cell surface antigens using commercial

antibodies and with Hoechst (Life Technologies, H3570). Coverslips were washed and mounted with Immomount media (Life Technologies, 9990402). Images were acquired at the confocal microscope Leica Sp8.

For live-cell imaging, claudin 6 (CLDN6)-electroporated iDC were seeded in a 96-well plate ( $1 \times 10^4$  cells/well). After O/N incubation CLDN6-TCR-electroporated CD8<sup>+</sup> T cells were added ( $2 \times 10^4$  cells/well), and the cells co-cultured in the presence of 0.125  $\mu\text{g/mL}$  of DuoBody-CD40x4-1BB or control antibodies. Time lapse videos were performed at 37°C and 5% CO<sub>2</sub> at the Nikon Eclipse TiE microscope with a time frame of 15 min.

Image analysis was performed using the Fiji (ImageJ 1.52p) software. The intensity profile of the fluorescence at the synapse was generated selecting the single channels *Image > Color > Channel Tool*. At the interface between the DC and the CD8<sup>+</sup> T cell, a line was generated selecting the *segmented line* tool. By selecting *Analyze > Plot profile* an intensity profile was generated. For the live imaging, cells were manually followed and the number of contacts and contact duration was manually determined during the videos.

### Flow cytometry

In preclinical studies, cells were stained for cell surface antigens using commercial antibodies for 15-30 min at 4°C. For intracellular staining, cells were fixed and permeabilized followed by intracellular staining for 30 min at 4°C. Viable cells were distinguished by staining with 7-aminoactinomycin D (7-AAD; Beckman Coulter, A07704), LIVE/DEAD™ Fixable Near-IR Dead cell stain kit (Thermo Scientific, L10119). Data were acquired on a BD FACSCanto™ or BD LSRFortessa™ X20 flow cytometer (BD Biosciences). For cell counting, negative control compensation beads (BD Biosciences, 51-90-9001291) were added to the cells prior to acquisition. Data was analyzed using FlowJo™ software V10.3. Proliferation analysis based on CFSE dilution was performed using the proliferation modeling tool from FlowJo, the generation peaks were automatically fitted and expansion index values were calculated.

Clinical study blood samples were collected just prior to DuoBody-CD40x4-1BB administration in Cycle 1 and 2, and on the following time points after administration in Cycle 1: Day 2, Day 3, Day 8 and Day 15. Cellular subsets in the blood were evaluated using antibody panels described in the Supplementary Methods and a Becton Dickinson FACSCanto™ flow cytometer equipped with FacsDiva software version 8.0.1.

### **Cytokine analysis**

In preclinical studies, cell culture supernatants were analyzed using the V-PLEX Proinflammatory Panel 1 Human Kit (Meso Scale Diagnostics LLC, K15049D-2) on a MESO QuickPlex SQ 120 instrument (Meso Scale Diagnostics, LLC., R31QQ-3), according to the manufacturer's instructions. In the MLR assays, cytokines were analyzed by ELISA using the Alpha Lisa IFN $\gamma$  kit (Perkin Elmer, AL217) or by Luminex using a custom Milliplex MAP Human cytokine/TH17 panel (Millipore Sigma, cat. no. SPR1526) on a Luminex FLEXMAP 3D instrument.

Clinical study blood samples were collected just prior to DuoBody-CD40x4-1BB administration in Cycle 1 and 2, and on the following time points after administration in Cycle 1: 2 h, 4-6 h, Day 2, Day 3, Day 8 and Day 15. Cytokines and chemokines were evaluated using V-PLEX Plus Human Biomarker 40-Plex kit (Meso Scale Diagnostics LLC, K15209G-1) on a Meso Sector S600 instrument (Meso Scale Diagnostics, LLC., IC0AA-0).

### **TCR repertoire analysis**

For TCR repertoire sequencing, total RNA was isolated from tumor tissue or snap-frozen cultured TILs using the RNeasy Mini kit (Qiagen, 74104). Libraries were generated with the SMARTer human TCR- $\alpha\beta$  profiling kit (Clontech, 635015) and were sequenced using the MiSeq system (Illumina). Data was analyzed using MiXCR<sup>2</sup> and VDJtools<sup>3</sup>.

**Supplementary Table****Supplementary Table 1 Binding affinity to recombinant human CD40 and 4-1BB**

Binding of DuoBody-CD40x4-1BB to recombinant human CD40 and 4-1BB was analyzed using biolayer interferometry (BLI). Experiments were performed using the recombinant extracellular domains of CD40 or 4-1BB immobilized on the biosensors and an antibody concentration range of 0.16 – 10 nM.  $K_D$  (nM) refers to the equilibrium dissociation constant of the antibody-antigen interaction.  $k_d$  ( $s^{-1}$ ) is the dissociation rate constant and  $k_a$  ( $M^{-1}s^{-1}$ ) the association rate constant.

| <b>Antibody</b>    | <b>Antigen</b>  | <b>n</b> | <b><math>k_a</math> (1/Ms)</b>        | <b><math>k_d</math> (1/s)</b>               | <b><math>K_D</math> (nM)</b> |
|--------------------|-----------------|----------|---------------------------------------|---------------------------------------------|------------------------------|
| DuoBody-CD40x4-1BB | human CD40-His  | <b>3</b> | $6.6 \times 10^5 \pm 1.5 \times 10^5$ | $6.7 \times 10^{-4} \pm 4.2 \times 10^{-5}$ | $1.0 \pm 0.19$               |
| DuoBody-CD40x4-1BB | human 4-1BB-His | <b>3</b> | $5.3 \times 10^5 \pm 1.1 \times 10^5$ | $8.9 \times 10^{-5} \pm 8.7 \times 10^{-6}$ | $0.17 \pm 0.02$              |



## Supplementary Figures

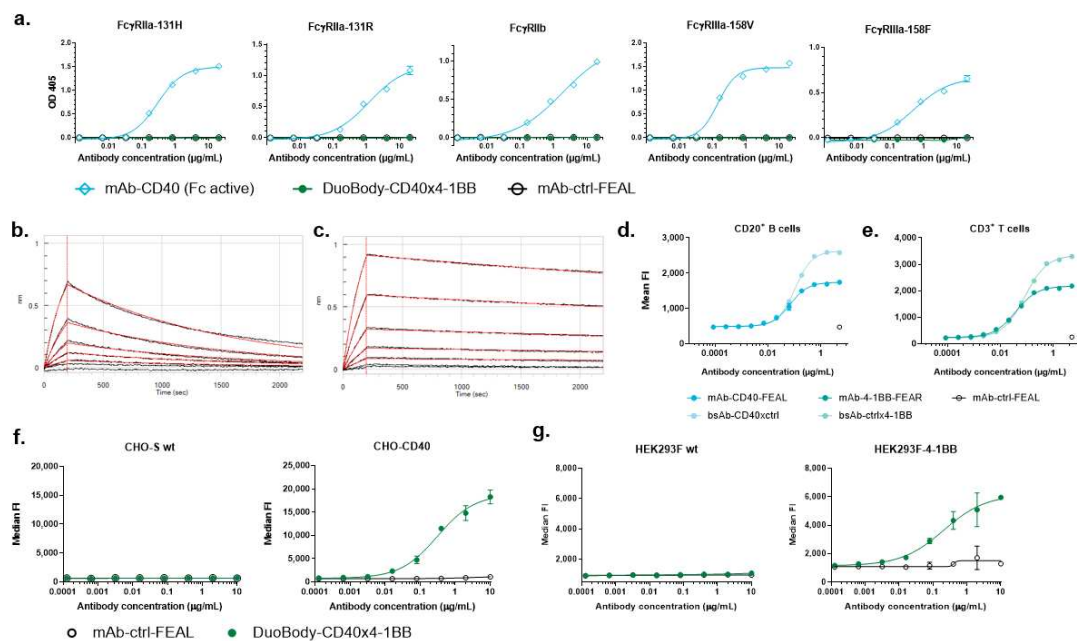

## Supplementary Figure 1 Target binding characteristics of DuoBody-CD40x4-1BB (related to Figure 1)

**A.** Binding of FcγRIIa, -RIIb and -RIIIa to the indicated immobilized antibodies was determined by ELISA using the previously described HisBAP dimeric FcγR constructs<sup>1</sup>. Two common coding polymorphisms were tested for both FcγRIIa (131H and 131R) and -RIIIa (158F and 158V)<sup>4,5,6</sup>. Data shown are mean optical densities at 405 nm (OD<sub>405</sub>) ± SD of duplicate measurements from one representative experiment (n=2). **B-C.** Binding of DuoBody-CD40x4-1BB to recombinant human CD40 (B) and 4-1BB (C) was analyzed by BLI. Experiments were performed using the recombinant ECD of CD40 or 4-1BB immobilized on the biosensors and an antibody concentration range of 0.023 – 1.5 μg/mL (0.16 - 10 nM). Association to and dissociation of DuoBody-CD40x4-1BB from CD40-His (B) or 4-1BB-His (C) is shown for one representative experiment (n=3). The black traces represent the association and dissociation of the antibody at different concentrations, the red traces represent the calculated global full fit using the 1:1 model. **D.** Binding of the CD40-specific Fab arm of DuoBody-CD40x4-1BB (bsAb-CD40xctrl) and control antibodies to human PBL *in vitro* was analyzed by flow cytometry. Data shown are MFI ± SD within the CD20<sup>+</sup> B-cell gate of triplicate measurements from one representative donor (n=2). **E.** Binding of the 4-1BB-specific Fab arm of DuoBody-CD40x4-1BB (bsAb-ctrlx4-1BB) and control antibodies to *in vitro* activated PBL was analyzed by flow cytometry. Data shown are MFI ± SD on CD3<sup>+</sup>4-1BB<sup>+</sup> T cells of triplicate measurements from one representative donor (n=3). **F.** Binding of DuoBody-CD40x4-1BB to wild type or CD40-expressing CHO-S cells was determined by flow cytometry and compared with binding of the non-humanized variant bsIgG1-chCD40x4-1BB. IgG1-ctrl-FEAL was taken along as negative control. Data shown are median fluorescence intensities (FI) ± SD from one representative experiment (n=3). **G.** Binding of DuoBody-CD40x4-1BB to wild type or 4-1BB-expressing HEK293F cells was determined by flow cytometry

and compared with binding of bsIgG1-chCD40x4-1BB. IgG1-ctrl-FEAL was taken along as negative control. Data shown are median FI  $\pm$  SD from one representative experiment (n=3).

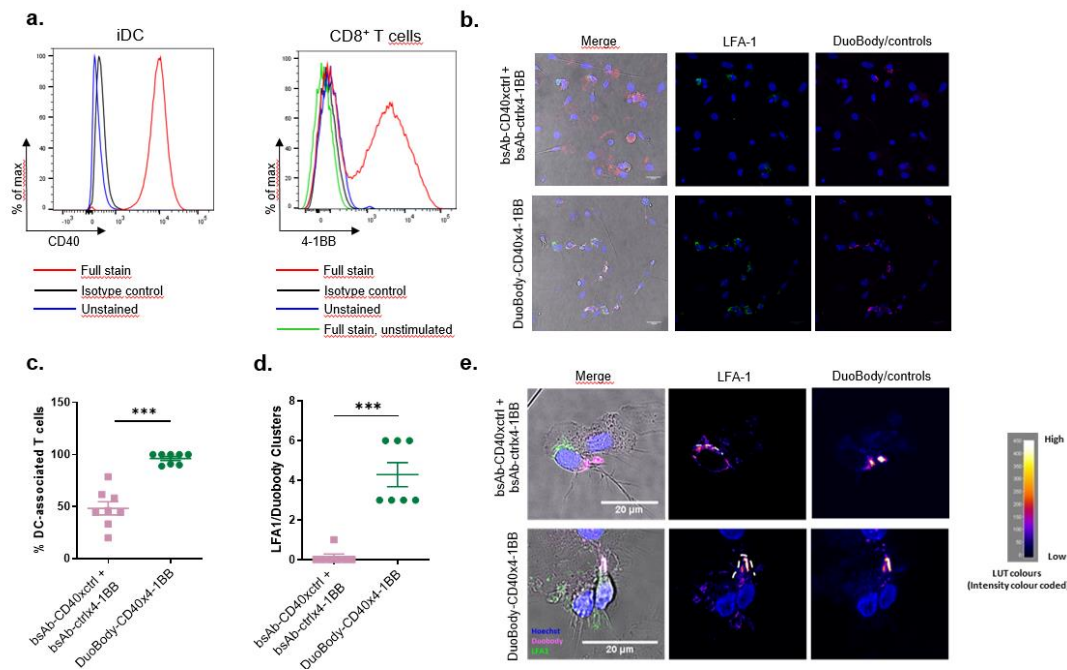

### Supplementary Figure 2 DuoBody-CD40x4-1BB enhances formation of the immune synapse between APCs and T cells (related to Figure 2)

**A.** Flow cytometry analysis of CD40 expression on iDCs and 4-1BB expression on CD8<sup>+</sup> T cells. **B.** Images of DC/T-cell co-cultures incubated with 0.125  $\mu$ g/mL Alexa Fluor 647-conjugated DuoBody-CD40x4-1BB or a combination of bsAb-CD40xctrl and bsAb-ctrlx4-1BB (in magenta) and stained with an anti-human LFA-1 (in green) antibody. Nuclei were counterstained with Hoechst (in blue). Scale bars: 20  $\mu$ m. **C.** The percentage of T cells that are associated with a DC. **D.** Clusters of LFA-1 with DuoBody-CD40x4-1BB or with control antibodies per field of view. \*\*\*,  $P < 0.001$ ; Mann-Whitney test. **E.** Higher magnification images of DC/T-cell co-cultures stained as in (B). Dashed line indicates the DC/T-cell interface.

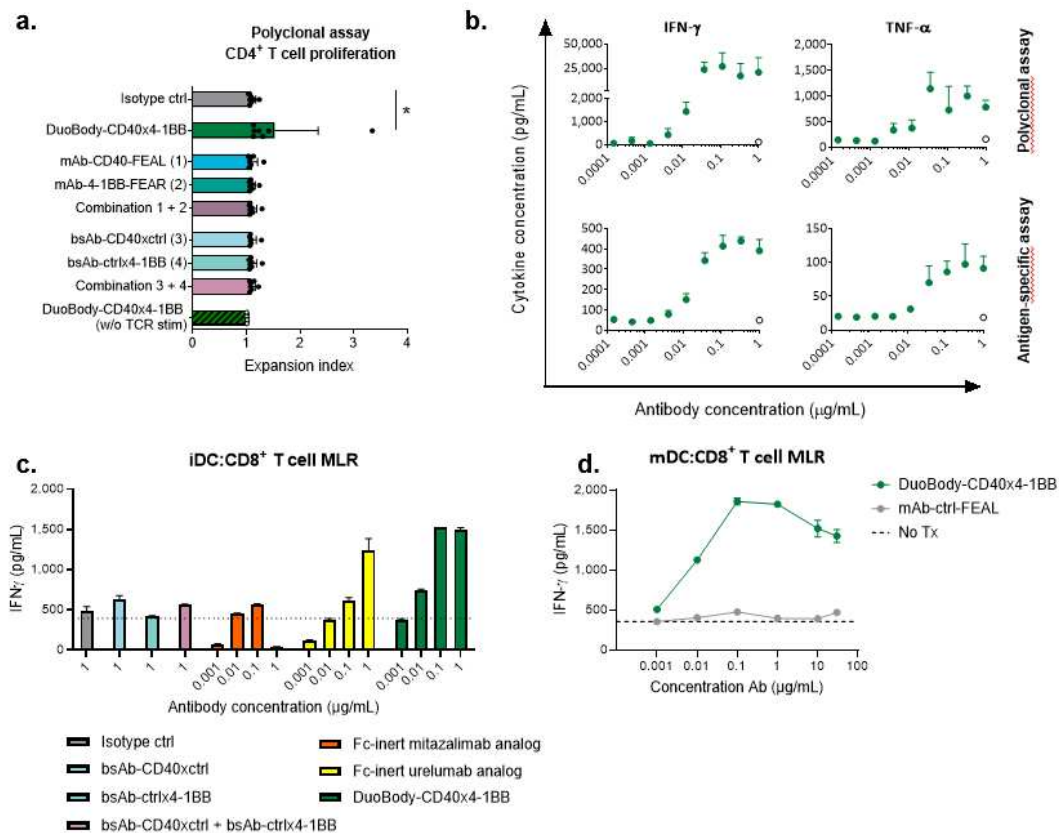

### Supplementary Figure 3 DuoBody-CD40x4-1BB enhances T-cell activation *in vitro*

**A.** CFSE-labeled human PBMCs were stimulated with 0.03 μg/mL anti-CD3 and incubated with DuoBody-CD40x4-1BB or control antibodies (0.2 μg/mL) for 4 days. CFSE dilution in CD4<sup>+</sup> T cells was analyzed by flow cytometry. Expansion index of individual donors and mean ± SD (n=7) is shown. \*, P<0.05; Friedman test. **B.** Supernatant of the polyclonal and antigen-specific T-cell proliferation assays described in Figure 5A-B were collected after 48 h of culture in the presence of DuoBody-CD40x4-1BB or isotype ctrl antibodies. Cytokine secretion was analyzed using the V-PLEX Proinflammatory Panel 1 Human Kit. Data shown are mean concentration ± SD of triplicate wells from one representative donor. **C.** Purified CD8 T cells from healthy donors were co-cultured with immature allogeneic DCs in the presence of DuoBody-CD40x4-1BB, Fc-inert analogs of clinical mAbs mitazalimab and urelumab (0.001-1 μg/mL), or control antibodies (1 μg/mL; for combination of control antibodies 1 μg/mL of both antibodies was added) for 5 days. **B.** IFNγ concentrations in supernatant taken after 5 days from cultures (derived from the same donor as shown in Figure 3). Data shown are mean concentration ± SD of duplicate wells from one representative donor (n=2). Dotted line shows percentage of IFNγ in DC-T-cell cultures in the absence of treatment. **D.** Purified CD8<sup>+</sup> T cells from healthy donors were co-cultured with LPS-matured allogeneic DCs in the presence of DuoBody-CD40x4-1BB or control antibodies for 4-5 days. The concentration of IFN-γ in the culture supernatant was analyzed by ELISA.

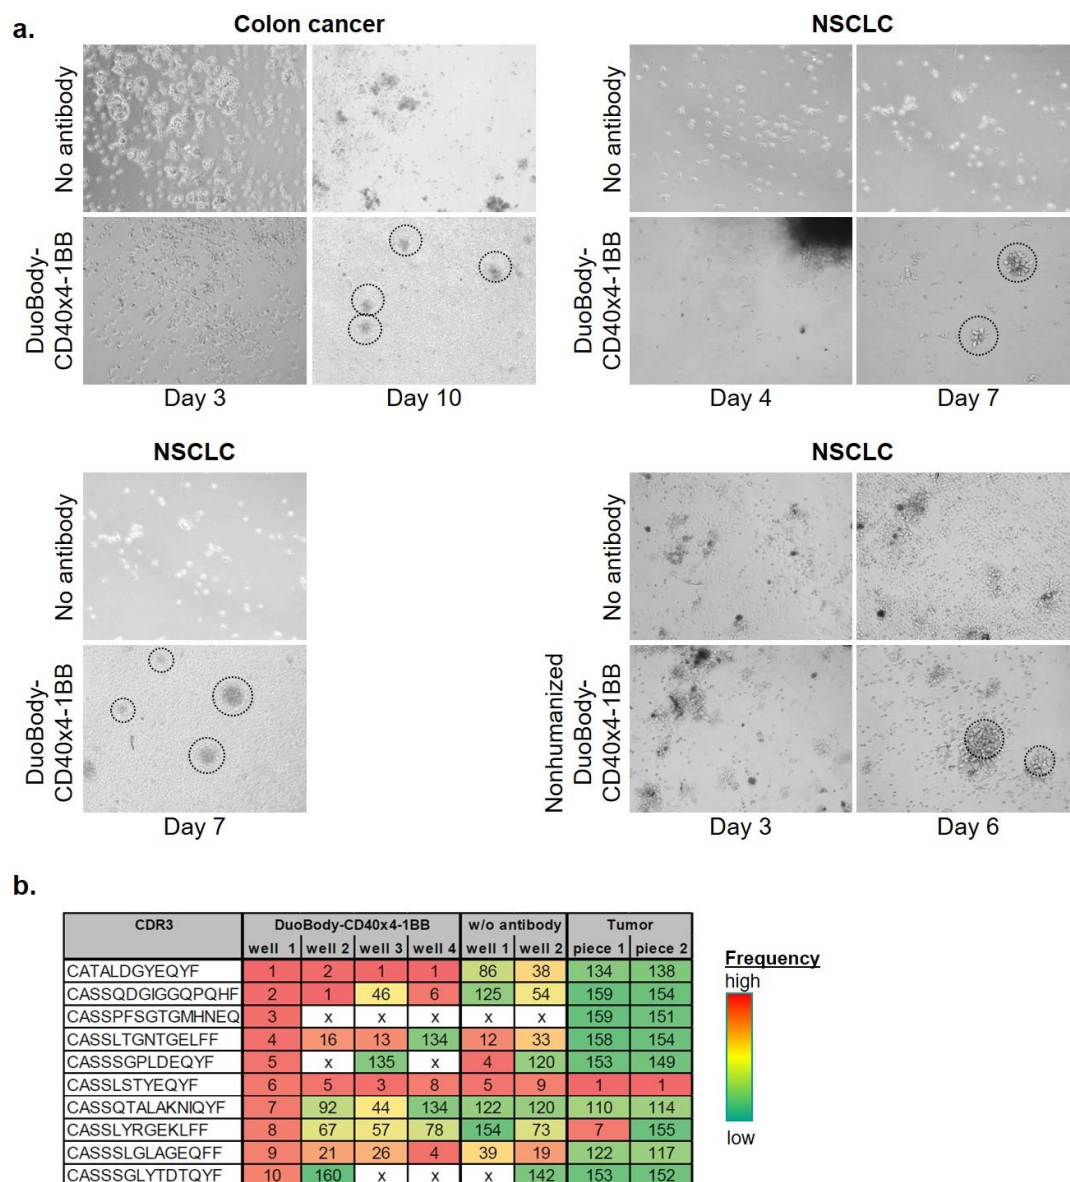

#### Supplementary Figure 4 DuoBody-CD40x4-1BB enhances TIL expansion

Tumor tissues resected from a colon cancer patient and three NSCLC patients were cut into pieces of 1-2 mm<sup>3</sup>, and cultured in the presence of IL-2 (10-50 U/mL) with or without DuoBody-CD40x4-1BB (0.0008 – 0.2 µg/mL) or a non-humanized DuoBody-CD40x4-1BB surrogate (0.01 – 1 µg/mL). **A.** TIL microclusters are highlighted by the dashed circles. **B.** TCR repertoire analysis was performed by *TRB* RNA sequencing of the expanded TIL and the tumor fragments derived from the NSCLC specimen. The ten most frequent clones (1-10) for well 1 of DuoBody-CD40x4-1BB surrogate-treated cultures were used as reference and the frequency rank of these sequences in all other samples is shown in B (from high frequency [red] to low frequency [green]).

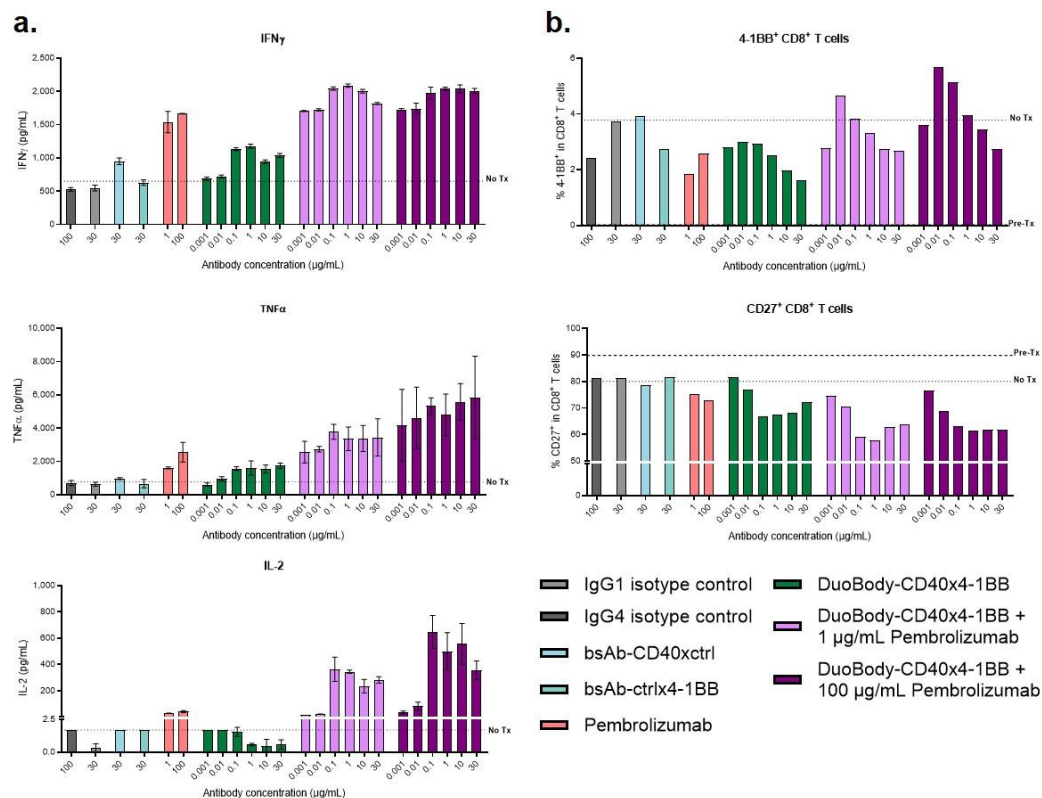

### Supplementary Figure 5 Combination of DuoBody-CD40x4-1BB with pembrolizumab amplifies the magnitude of the immune response

Purified CD8 $^+$  T cells from healthy donors were co-cultured with LPS-matured allogeneic DCs in the presence of DuoBody-CD40x4-1BB, research-grade pembrolizumab (either alone or in combination [concurrent treatment]) or control antibodies for 5 days. **A.** Cytokine concentrations in supernatant taken after 5 days of culture in the presence of indicated antibodies. Data shown are mean concentration  $\pm$  SD of duplicate wells from one donor pair (DC: LS1166085; T: LS8843759B). Dashed line indicates co-cultures that were not treated with antibody (No Tx). **B.** The percentage of 4-1BB $^+$  CD8 $^+$  T cells and CD27 $^+$  CD8 $^+$  T cells was measured by flow cytometry. Data shown are the percentage of positive cells within the total CD8 $^+$  T-cell population from one donor pair. Target expression (CD40, 4-1BB and PD-L1) on DCs is shown in Figure S6. Dashed line indicates co-cultures on Day 0 (before antibodies were added to the treated co-cultures) and co-cultures that were not treated with antibody at Day 5 of the MLR assay (No Tx).



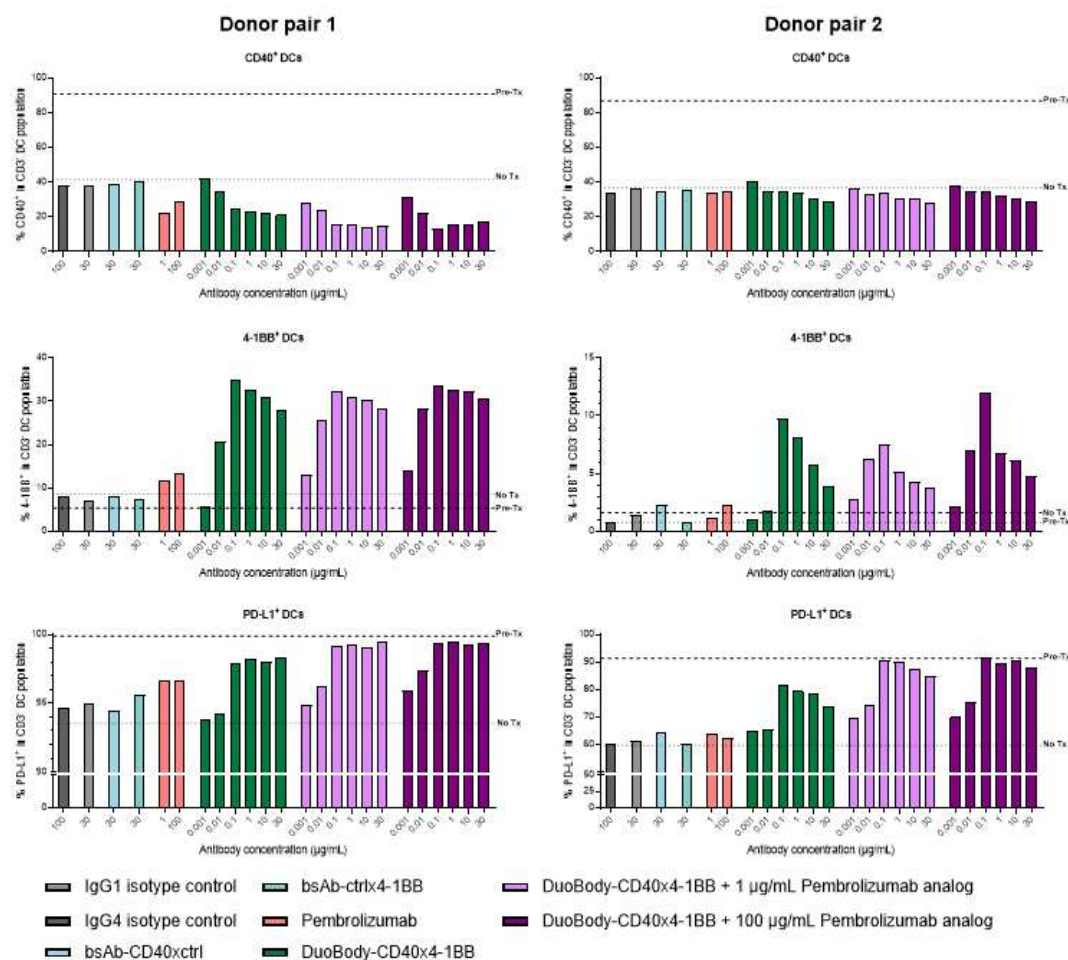

### Supplementary Figure 6 Target expression in co-cultures of mDCs with CD8<sup>+</sup> T cells

Purified CD8 T cells from healthy donors were co-cultured with LPS-matured allogeneic DCs in the presence of DuoBody-CD40x4-1BB, research-grade pembrolizumab (either alone or in combination [concurrent treatment]) or control antibodies for 5 days. The percentage of CD40<sup>+</sup>, 4-1BB<sup>+</sup> and PD-L1<sup>+</sup> DCs was measured by flow cytometry. Data shown are the percentage of positive cells within the total CD3<sup>+</sup> DC population from two donor pairs (associated with Figure 7 and S5). PD-1 expression on T cells could not be evaluated due to the presence of pembrolizumab in the co-cultures, limiting binding of fluorescently-labeled PD-1 antibodies used for flow cytometry. Dashed line indicates co-cultures on Day 0 (before antibodies were added to the treated co-cultures) and co-cultures that were not treated with antibody at Day 5 of the MLR assay (No Tx).

## References

1. Wines BD, Vandervan HA, Esparon SE, Kristensen AB, Kent SJ, Hogarth PM. Dimeric FcγRIIIa Ectodomains as Probes of the Fc Receptor Function of Anti-Influenza Virus IgG. *J Immunol* **197**, 1507-1516 (2016).
2. Bolotin DA, *et al.* MiXCR: software for comprehensive adaptive immunity profiling. *Nature Methods* **12**, 380-381 (2015).
3. Shugay M, *et al.* VDJtools: Unifying Post-analysis of T Cell Receptor Repertoires. *PLoS Comput Biol* **11**, e1004503 (2015).
4. Koene HR, Kleijer M, Algra J, Roos D, von dem Borne AE, de Haas M. Fc γRIIIa-158V/F polymorphism influences the binding of IgG by natural killer cell Fc γRIIIa, independently of the Fc γRIIIa-48L/R/H phenotype. *Blood* **90**, 1109-1114 (1997).
5. Warmerdam PA, van de Winkel JG, Vlug A, Westerdal NA, Capel PJ. A single amino acid in the second Ig-like domain of the human Fc γRIIIb is critical for human IgG2 binding. *J Immunol* **147**, 1338-1343 (1991).
6. Wu J, *et al.* A novel polymorphism of FcγRIIIa (CD16) alters receptor function and predisposes to autoimmune disease. *J Clin Invest* **100**, 1059-1070 (1997).
